# Supplementary material for: Exploring the abundance, metabolic potential and gene expression of subseafloor Chloroflexi in million-year-old oxic and anoxic abyssal clay
Source: PubMed Central journal article supplement — FEMS Microbiol Ecol. 2020 Nov 5;96(12):fiaa223. doi: 10.1093/femsec/fiaa223 (PMC7688785; doi:10.1093/femsec/fiaa223), 2020-11-05
Supplement: fiaa223_supplemental_file.pdf [file fiaa223_supplemental_file.pdf]

## *Supporting Information*

### **Exploring the abundance, metabolic potential, and gene expression of subseafloor *Chloroflexi* in million-year-old oxic and anoxic abyssal clay**

Aurèle Vuillemin\*, Zak Kerrigan, Steven D'Hondt, and William D. Orsi

The Supporting Information includes:

- 5 Supplementary Figures
- 1 Supplementary Table
- Supplementary Data (provided separately)

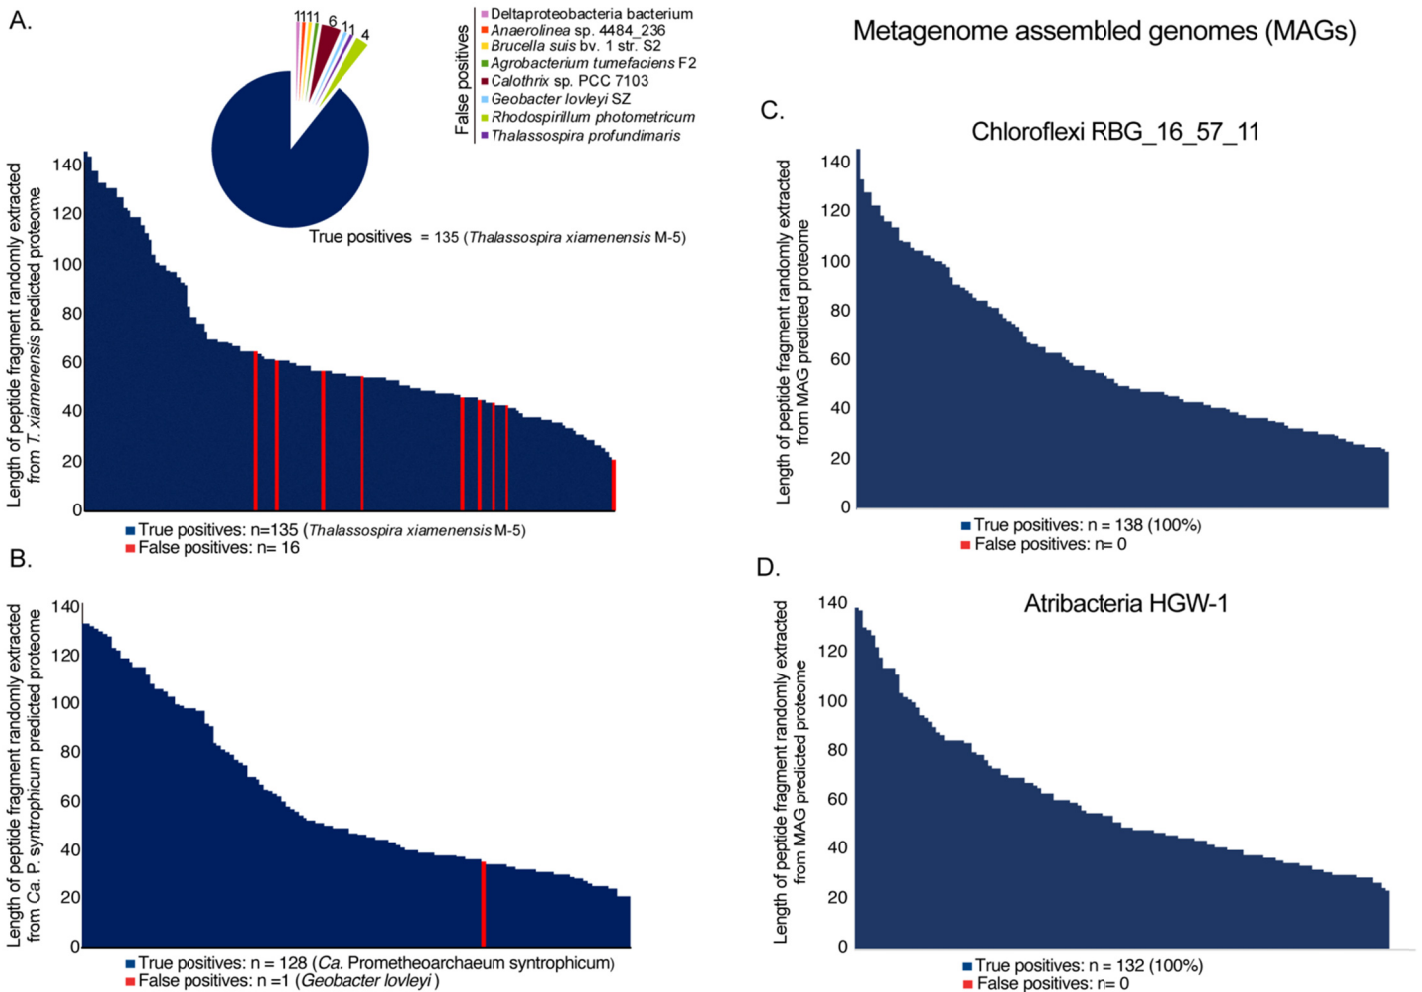

**Supplementary Figure 1 | An *in silico* experiment testing the rate of true positives and false negative annotations of 151 simulated ORFs (randomly selected peptide fragments) from the predicted proteomes of a cultivated bacterium and three metagenomic-assembled genomes. (A)** 89% of simulated ORFs (n=151 randomized peptide fragments) are correctly annotated to the species level (“*T. xiamenensis*”), and 93% of simulated ORFs are correctly annotated to the genus level when comparing against MetaProt. **(B)** The same experiment applied to the predicted proteomes of the archaeon “*Ca. Prometheoarchaeum syntrophicum*”, **(C)** Chloroflexi and **(D)** “*Ca. Atribacteria*” MAGs shows that the false negative rate is much lower than compared to the bacterial genome: only one out of 150 peptide fragments were incorrectly assigned.

The red and blue colors in the histogram plots represent those random peptide fragments that were assigned as false negatives and true positives, respectively: e.g., those that had highest similarity (best BLASTp hit) to an organism other than “*T. xiamenensis*”, “*Ca. Prometheoarchaeum syntrophicum*”, Chloroflexi and “*Ca. Atribacteria*” in the MetaProt database (e.g., the individual thin slices in the pie chart figure above).

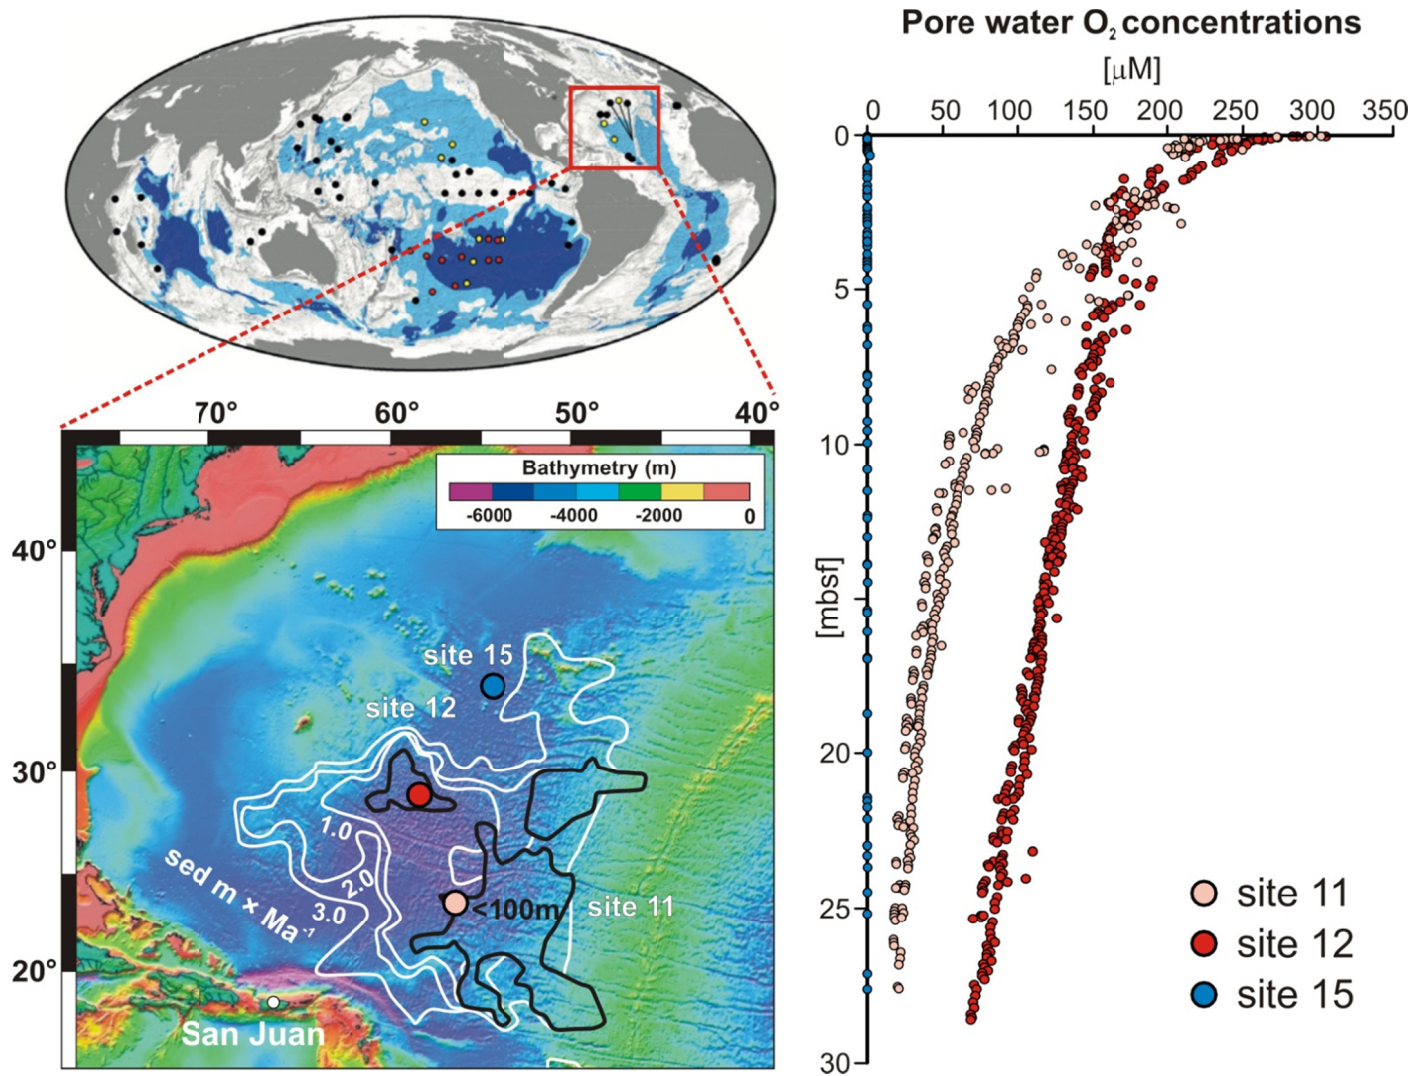

**Supplementary Figure 2 | Map of sampling site 11, 12 and 15 with bathymetry, sedimentation rates and pore water O<sub>2</sub> profiles.** (Left) Global map of subseafloor sedimentation rates and corresponding O<sub>2</sub> penetration is modified from D'Hondt *et al.* (2015). (Right) Note that at site 11 and 12, there is O<sub>2</sub> penetrating to 30 mbsf, whereas at site 15 O<sub>2</sub> is consumed immediately at the seafloor surface and the entire sediment sequence is anoxic.

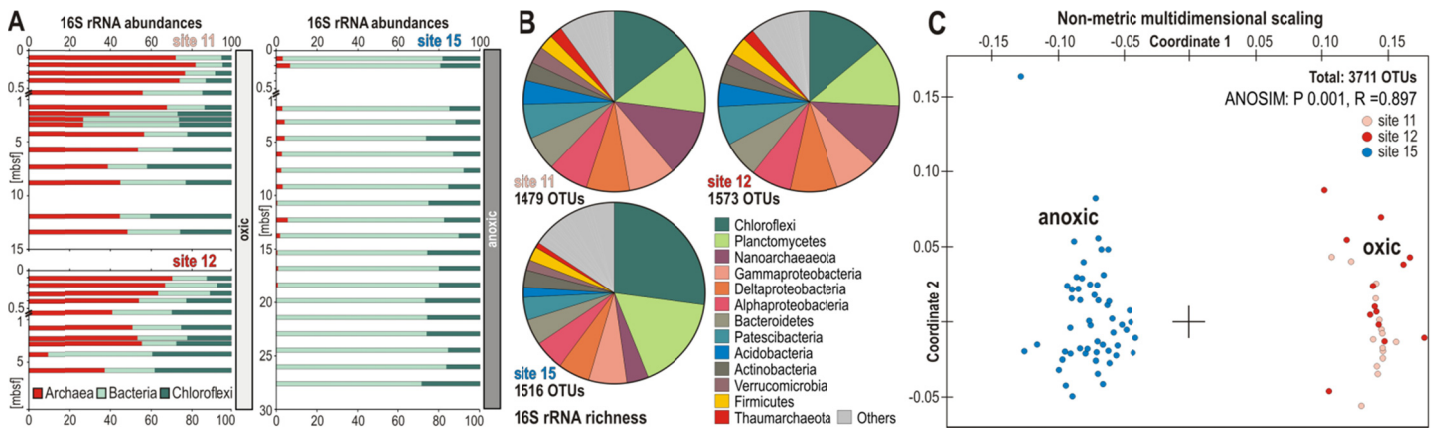

**Supplementary Figure 3 | Microbial abundance, richness beta diversity based on 16S rRNA genes.** (A) Downcore profiles for the relative abundances of Archaea (red), Chloroflexi (dark green) and all other Bacteria (light green). (B) Richness of 16S rRNA genes based on the total number of OTUs. (C) Non-metrical dimensional scaling (NMDS) plot for all three sites based on all OTUs obtained from 16S rRNA gene amplicons, with significant separation between oxic and anoxic sediment.

## Oxic sites

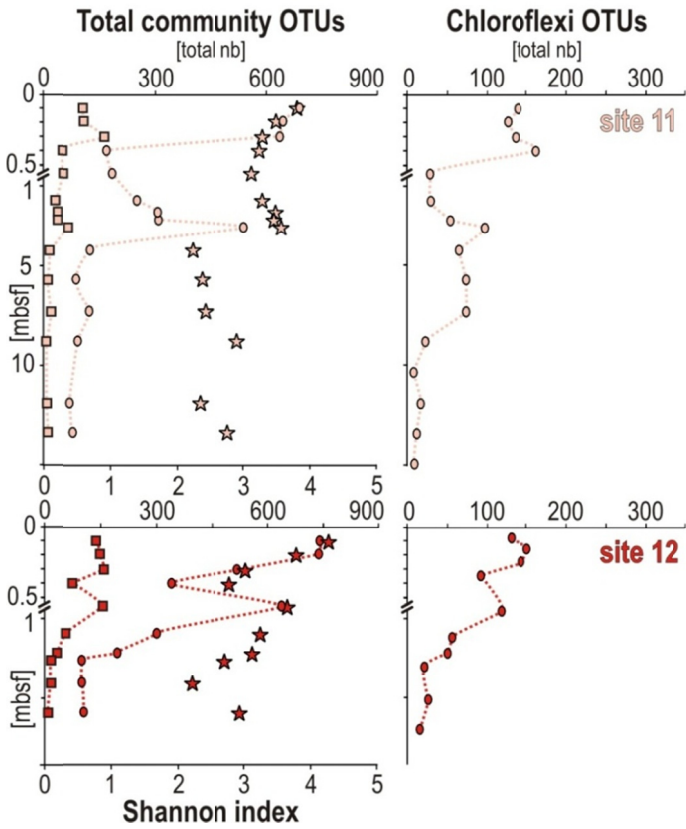

## Anoxic site

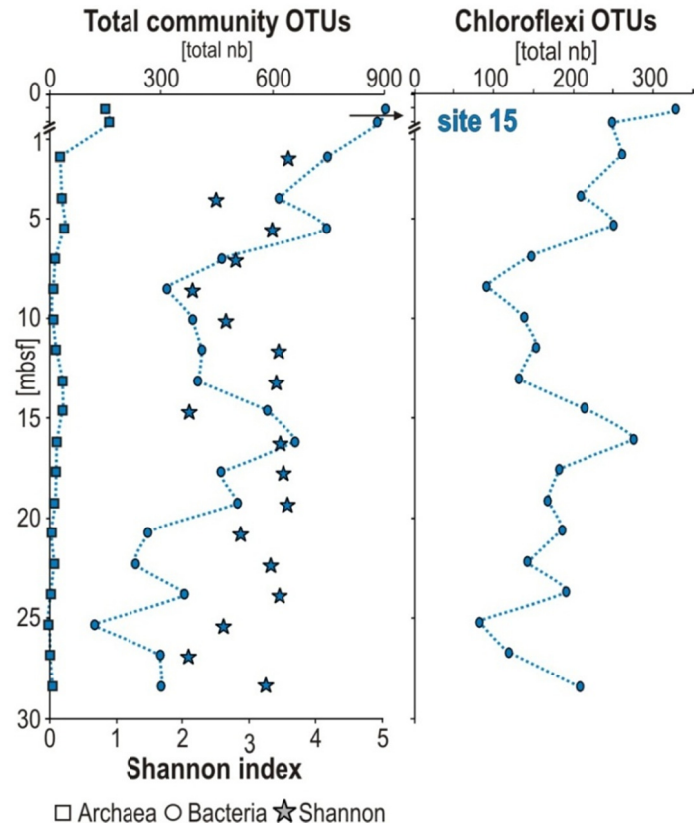

**Supplementary Figure 4 | Alpha diversity for whole communities and Chloroflexi at the three sites. (Left)** Total number of OTUs assigned to Archaea (squares), and Bacteria (circles) with Shannon indices (stars) calculated for the whole populations at the two oxic sites; number of OTUs assigned to Chloroflexi at the two oxic sites. **(Right)** Same indices calculated for populations from the anoxic site.

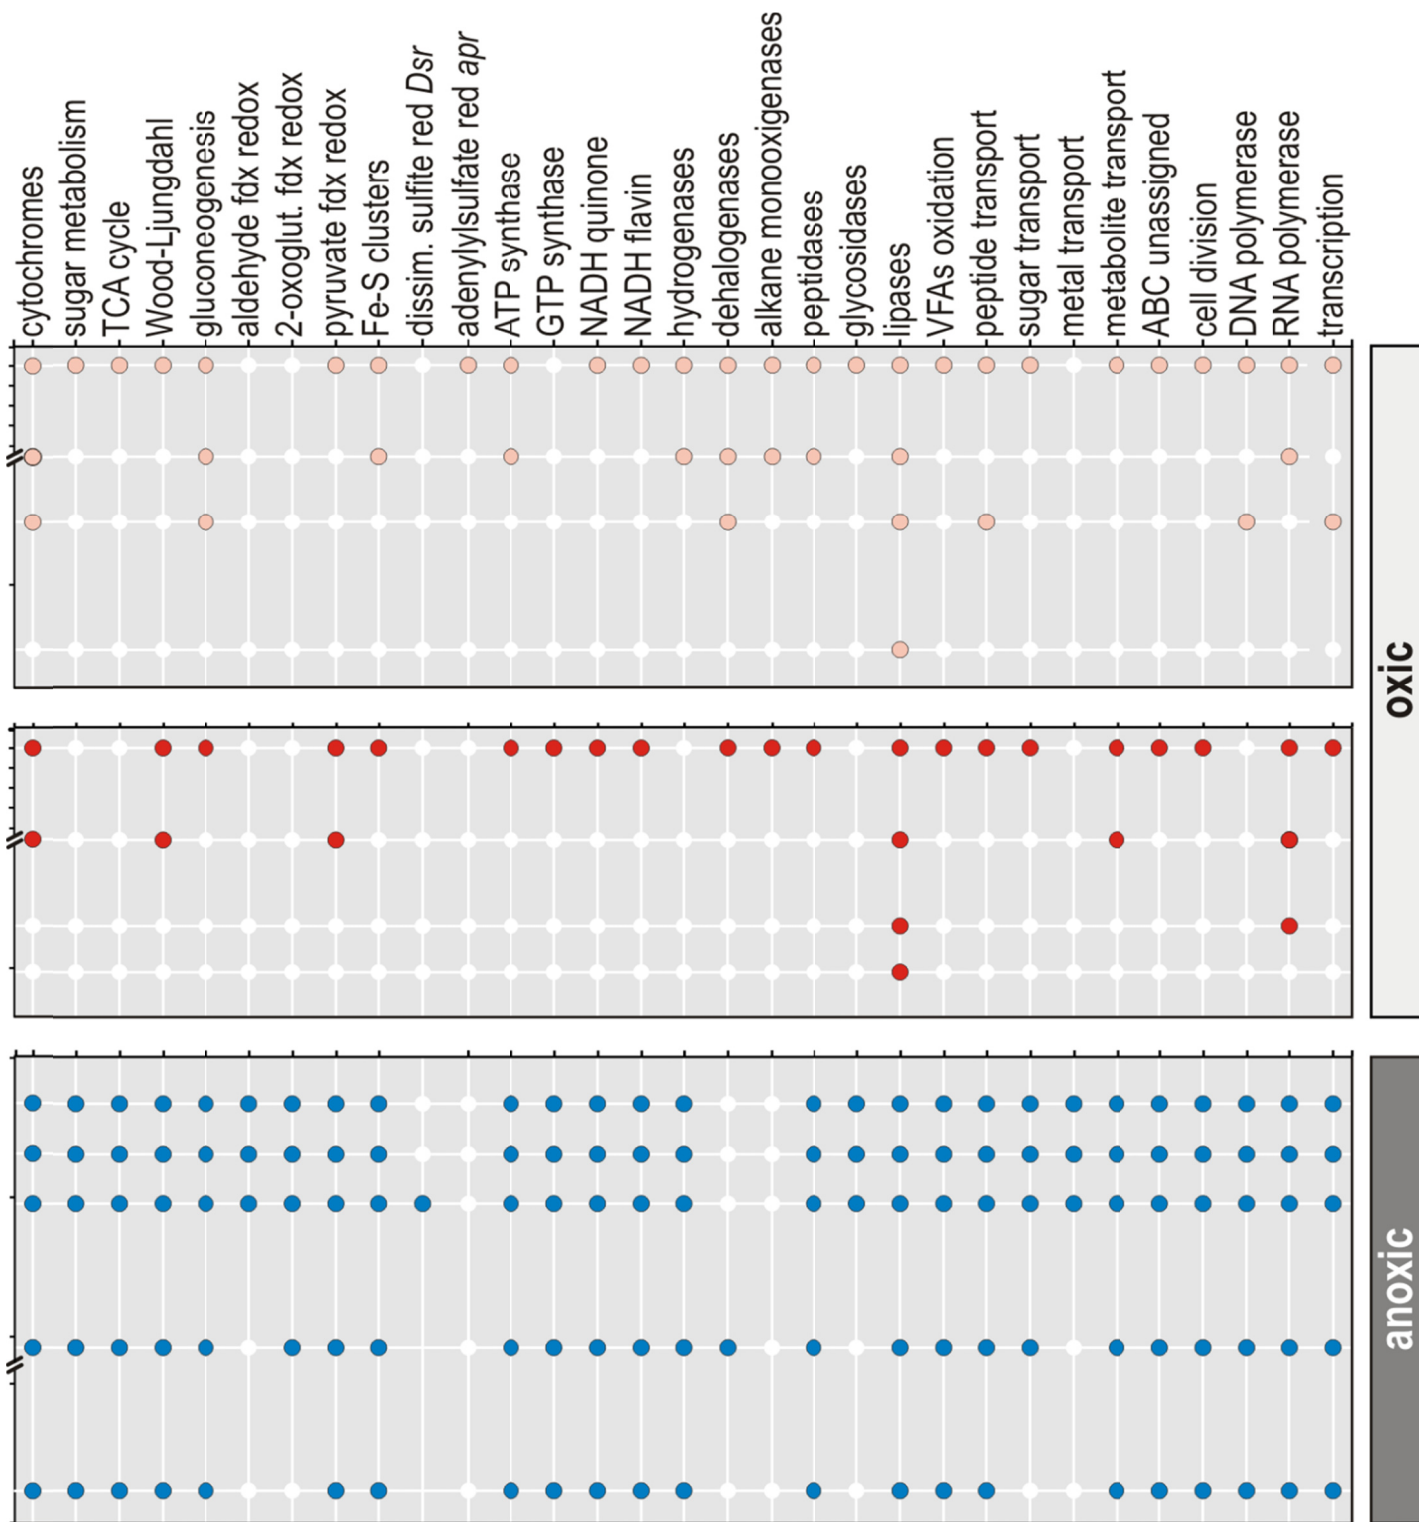

**Supplementary Figure 5 | Metabolic potential detected in metagenomic libraries.** Metabolic functions and pathways detected in metagenomes at the three sites. For a detailed list of the genes identified, see Supplementary Data.

| Metagenomes    | depth [m] | # sequences | # contigs | # mapped reads | # annotated ORFs | Accession no. | Run Accession no. |
|----------------|-----------|-------------|-----------|----------------|------------------|---------------|-------------------|
| Site 11        | 0.1       | 15,314,358  | 104,349   | 10,153,456     | 42,254           | SAMN10924458  | SRX5372537        |
|                | 0.9       | 6,479,556   | 8.857     | 5,103,508      | 5,137            | SAMN10924458  | SRX5372538        |
|                | 2.8       | 5,593,704   | 8.952     | 5,126,686      | 3,871            | SAMN10924458  | SRX5372539        |
|                | 7.4       | 10,074,790  | 602       | 8,235,415      | 276              | SAMN10924458  | SRX5372540        |
|                | 15        | 8,920,356   | 144       | 7,503,283      | 18               | SAMN10924458  | SRX5372541        |
| Site 12        | 0.1       | 5,298,416   | 17.05     | 4,181,095      | 9,041            | SAMN10924459  | SRX5372542        |
|                | 0.9       | 3,961,194   | 3.464     | 3,741,957      | 2,151            | SAMN10924459  | SRX5372543        |
|                | 3.5       | 6,528,088   | 1.407     | 6,200,598      | 522              | SAMN10924459  | SRX5372544        |
|                | 5.1       | 5,353,236   | 32.673    | 7,503,283      | 67               | SAMN10924459  | SRX5372545        |
| Site 15        | 2.1       | 9,294,114   | 29.185    | 8,723,374      | 13,134           | SAMN13317858  | SRR10481892       |
|                | 3.5       | 9,226,836   | 15.319    | 8,517,416      | 22,876           | SAMN13317859  | SRR10481891       |
|                | 5.2       | 4,158,110   | 12.734    | 3,488,721      | 9,137            | SAMN13317860  | SRR10481887       |
|                | 15        | 8,321,518   | 10.194    | 7,435,919      | 8,568            | SAMN13317861  | SRR10481886       |
|                | 29        | 10,746,984  | 2.725     | 10,039,210     | 2,894            | SAMN13317862  | SRR10481885       |
| Transcriptomes | depth [m] | # sequences | # contigs | # mapped reads | # annotated ORFs | Accession no. | Run Accession no. |
| Site 15        | 0.1 (A)   | 4,025,956   | 1'795     | 3'104'523      | 3,343            | SAMN13317863  | SRR10481884       |
|                | 0.1 (B)   | 3,532,876   | 2'044     | 2'770'901      | 98               | SAMN13317863  | SRR10481884       |
|                | 0.1 (C)   | 4,960,078   | 3'174     | 4'055'833      | 305              | SAMN13317863  | SRR10481884       |
|                | 2.1 (A)   | 5,193,626   | 2'382     | 3'243'072      | 329              | SAMN13317864  | SRR10481883       |
|                | 2.1 (B)   | 6,188,052   | 1'782     | 5'327'917      | 188              | SAMN13317864  | SRR10481883       |
|                | 2.1 (C)   | 21,222,363  | 31'254    | 19'007'366     | 276              | SAMN13317864  | SRR10481883       |
|                | 3.5 (A)   | 3,640,918   | 861       | 3'121'393      | 152              | SAMN13317865  | SRR10481882       |
|                | 3.5 (B)   | 2,017,858   | 546       | 1'612'249      | 135              | SAMN13317865  | SRR10481882       |
|                | 3.5 (C)   | 3'419'882   | 1'124     | 2'343'420      | 2,963            | SAMN13317865  | SRR10481882       |
|                | 3.5 (D)   | 3'054'074   | 746       | 2'420'948      | 1,827            | SAMN13317865  | SRR10481882       |
|                | 3.5 (E)   | 1'949'964   | 550       | 1'428'941      | 1,304            | SAMN13317865  | SRR10481882       |
|                | 3.5 (F)   | 2'742'258   | 656       | 2'298'551      | 1,545            | SAMN13317865  | SRR10481882       |
|                | 3.5 (G)   | 3'093'748   | 1030      | 2'410'463      | 258              | SAMN13317865  | SRR10481882       |
|                | 5.2 (A)   | 5'347'824   | 10'204    | 2'001'032      | 1,262            | SAMN13317866  | SRR10481881       |
|                | 5.2 (B)   | 3'673'384   | 6'075     | 1'142'750      | 1,098            | SAMN13317866  | SRR10481881       |
|                | 6.7 (A)   | 4'672'286   | 5'583     | 1'712'037      | 1,748            | SAMN13317867  | SRR10481880       |
|                | 6.7 (B)   | 7'253'508   | 6'654     | 2'396'752      | 1,493            | SAMN13317867  | SRR10481880       |
|                | 8.2 (A)   | 5'311'371   | 3'378     | 3'834'338      | 2,730            | SAMN13317868  | SRR10481890       |
|                | 8.2 (B)   | 6'140'536   | 2'055     | 2'666'190      | 285              | SAMN13317868  | SRR10481890       |
|                | 8.2 (C)   | 3'405'518   | 1'312     | 2'424'526      | 306              | SAMN13317868  | SRR10481890       |
| 9.7 (A)        | 6'159'540 | 3'346       | 3'256'870 | 623            | SAMN13317869     | SRR10481889   |                   |
| 9.7 (B)        | 4'494'022 | 2'571       | 1'519'639 | 560            | SAMN13317869     | SRR10481889   |                   |
| 15.9 (A)       | 1'091'556 | 1'192       | 849'855   | 72             | SAMN13317870     | SRR10481888   |                   |
| 15.9 (B)       | 3'214'672 | 835         | 2'790'696 | 132            | SAMN13317870     | SRR10481888   |                   |

**Supplementary Table 1 | Sequencing and assembly results for the subsurface metagenomes at site 11, 12 and 15, and transcriptomes at site 15 with their corresponding accession and run accession numbers.**
